# Supplementary material
Source: publisher figshare collection journal article supplement (https://future-science-group.figshare.com/ndownloader/files/33035999)
Supplement: Supplementary file 1 [file 33035999]

|  | Lot 1 GOLD SULFO-TAG / Lot 1 LC-Biotin | | Scale-Up GOLD SULFO-TAG / Lot 1 LC-Biotin | | Lot 1 GOLD SULFO-TAG / Scale-Up LC-Biotin | |
| --- | --- | --- | --- | --- | --- | --- |
|  | ECL | S:B | ECL | S:B | ECL | S:B |
| NQC | 50 | N/A | 58 | N/A | 64 | N/A |
| LQC | 230 | 4.6 | 275 | 4.8 | 257 | 4.0 |
| HQC | 3380 | 67.8 | 3462 | 60.1 | 3902 | 61.2 |
